# Supplementary material for: Effectiveness of Naturally Acquired and Vaccine-Induced Immune Responses to SARS-CoV-2 Mu Variant
Source: PubMed Central journal article supplement (PMC9328909; doi:10.3201/eid2808.220584), 2022-08
Supplement: 22-0584-Techapp-s1.pdf [file 22-0584-Techapp-s1.pdf]

# Effectiveness of Naturally Acquired and Vaccine-Induced Immune Responses to SARS-CoV-2 Mu Variant

## Appendix

### Participant Recruitment and Sampling

The study was approved by the Ethics Committee of the Universidad Industrial de Santander (protocol 4110) and by the Ethics Committee of the Charité Universitätsmedizin-Berlin (Protocol EA2/031/22). All patients provided written informed consent. To control whether the vaccinated persons also had been naturally infected, subjects were followed up and did not report clinical symptoms or direct contact with persons who tested positive until sampling. In addition to that, all persons vaccinated with the spike-based vaccines from Pfizer and AstraZeneca tested negative for antibodies against the SARS-CoV-2 N protein, suggesting lack of natural infection and consistent with recording of clinical symptoms.

### 50% Plaque Reduction Neutralization Tests

We used a parental SARS-CoV-2 B.1 lineage strain (Pango version 3.1.17) sampled in January 2020 (Munich/ChVir929/2020 strain, GISAID accession: EPI\_ISL\_406862), containing one mutation (D614G) in the spike-encoding gene only compared to the SARS-CoV-2 reference sequence used for vaccine production (Isolate Wuhan-Hu-1 GenBank accession number: NC045512). We used the following SARS-CoV-2 variants: Alpha (ChVir21652/2020, GISAID accession: EPI\_ISL\_802995), Beta (ChVir22131/2021, GISAID accession: EPI\_ISL\_862149), Gamma (NH-RIVM\_10915/2021, GISAID accession: EPI\_ISL\_943045), Delta (454236/2021, GISAID accession: EPI\_ISL\_4566914), Mu (H3/2021, GISAID accession: EPI\_ISL\_6665693) and Omicron (hCoV-19/Netherlands/NH-RIVM-71076/2021, GISAID accession: EPI\_ISL\_6841611.2; Pango lineage: BA.1.17.2). A total of 60 plaque-forming units were incubated with serum dilutions of 1:40, 1:120, 1:360, and 1:1080 for 1 h, and afterwards added onto a monolayer containing  $1.8 \times 10^5$  Vero E6 cells per well in a 12-well plate. After 1 h of

incubation, an overlay containing DMEM with 1% FCS and 2% Avicell was added, and cells were further incubated for 3 d for Mu and 2 d for the other variants. The overlay medium was removed, and cells were fixated with 6% paraformaldehyde and stained with crystal violet. PRNT50 endpoint titers were calculated using a logistic regression function in GraphPad prism6 ([www.graphpad.com](http://www.graphpad.com)).

### Antigenic Cartography

Antigenic cartography was done using the R package Racmacs (on <https://acorg.github.io/Racmacs>) as described elsewhere (S.H. Wilks; unpub. data, <https://www.biorxiv.org/content/10.1101/2022.01.28.477987v1>). Comparative neutralization of SARS-CoV-2 variants by serum samples from persons fully immunized with the different vaccines (BioNTech-Pfizer BNT162b2, AstraZeneca AZD1222, and CoronaVac). Each point represents 50% plaque reduction neutralization test endpoint titers of 1 tested serum using different SARS-CoV-2 variants.

**Appendix Table.** List of samples and reciprocal PRNT<sub>50</sub> endpoint titers of serum samples for vaccinated persons\*†

| Sample ID | Early isolate | Mu  | Alpha | Beta | Gamma | Delta | Omicron | D after 2nd dose | Age | Vaccine     |
|-----------|---------------|-----|-------|------|-------|-------|---------|------------------|-----|-------------|
| AZ2       | 204           | 41  | 154   | 79   | 64    | 77    | 13      | 129              | 64  | AstraZeneca |
| AZ3       | 453           | 123 | 381   | 305  | 306   | 470   | 25      | 173              | 69  | AstraZeneca |
| AZ4       | 75            | 3   | 91    | 16   | 20    | 24    | 6       | 173              | 72  | AstraZeneca |
| AZ5       | 76            | 9   | 104   | 3    | 13    | 29    | 2       | 146              | 61  | AstraZeneca |
| AZ6       | 34            | 4   | 45    | 3    | 23    | 15    | 0       | 165              | 72  | AstraZeneca |
| AZ9       | 179           | 35  | 189   | 75   | 128   | 84    | 10      | 142              | 61  | AstraZeneca |
| AZ10      | 319           | 9   | 153   | 47   | 55    | 26    | 8       | 142              | 63  | AstraZeneca |
| PF1       | 119           | 9   | 85    | 1    | 18    | 38    | 3       | 113              | 65  | BioNTech    |
| PF2       | 28            | 3   | 43    | 35   | 15    | 17    | 3       | 170              | 42  | BioNTech    |
| PF3       | 262           | 62  | 158   | 130  | 101   | 149   | 19      | 110              | 46  | BioNTech    |
| PF4       | 754           | 121 | 715   | 204  | 226   | 187   | 43      | 110              | 27  | BioNTech    |
| PF5       | 501           | 87  | 320   | 48   | 91    | 259   | 9       | 121              | 29  | BioNTech    |
| PF6       | 123           | 10  | 119   | 52   | 15    | 11    | 3       | 80               | 46  | BioNTech    |
| PF7       | 214           | 9   | 70    | 5    | 0     | 125   | 3       | 88               | 54  | BioNTech    |
| PF8       | 207           | 18  | 167   | 28   | 25    | 66    | 3       | 66               | 35  | BioNTech    |
| PF9       | 715           | 10  | 273   | 0    | 46    | 108   | 2       | 65               | 49  | BioNTech    |
| PF10      | 1043          | 132 | 1,036 | 343  | 333   | 799   | 47      | 89               | 53  | BioNTech    |
| SVN1      | 51            | 54  | 72    | 36   | 66    | 83    | 0       | 89               | 56  | CoronaVac   |
| SVN2      | 47            | 9   | 24    | 23   | 21    | 22    | 0       | 33               | 23  | CoronaVac   |
| SVN3      | 41            | 6   | 1     | 1    | 18    | 1     | 0       | 31               | 30  | CoronaVac   |
| SVN4      | 118           | 61  | 151   | 111  | 89    | 87    | 25      | 27               | 28  | CoronaVac   |
| SVN7      | 363           | 162 | 347   | 407  | 188   | 259   | 56      | 37               | 27  | CoronaVac   |
| SVN8      | 303           | 5   | 93    | 26   | 30    | 61    | 5       | 37               | 54  | CoronaVac   |
| SVN9      | 53            | 0   | 32    | 3    | 15    | 35    | 0       | 41               | 25  | CoronaVac   |
| SVN10     | 65            | 4   | 27    | 0    | 10    | 66    | 1       | 46               | 26  | CoronaVac   |
| SVN12     | 52            | 8   | 52    | 1    | 20    | 21    | 0       | 105              | 60  | CoronaVac   |
| SVN13     | 387           | 24  | 126   | 126  | 35    | 130   | 7       | 90               | 57  | CoronaVac   |
| SVN15     | 145           | 175 | 168   | 197  | 147   | 133   | 19      | 131              | 92  | CoronaVac   |
| SVN16     | 67            | 2   | 6     | 25   | 10    | 21    | 3       | 90               | 54  | CoronaVac   |
| SVN17     | 24            | 1   | 1     | 5    | 0     | 15    | 3       | 97               | 56  | CoronaVac   |
| SVN18     | 65            | 0   | 3     | 4    | 0     | 24    | 7       | 81               | 52  | CoronaVac   |
| SVN20     | 686           | 464 | 612   | 155  | 131   | 503   | 16      | 46               | 28  | CoronaVac   |

\*AZ, AstraZeneca; PF, Pfizer; SVN, Sinovac

†Because we followed the Colombian vaccination program, it was not possible to collect samples the same time after completing the recommended vaccination scheme and the subjects' age were variable.

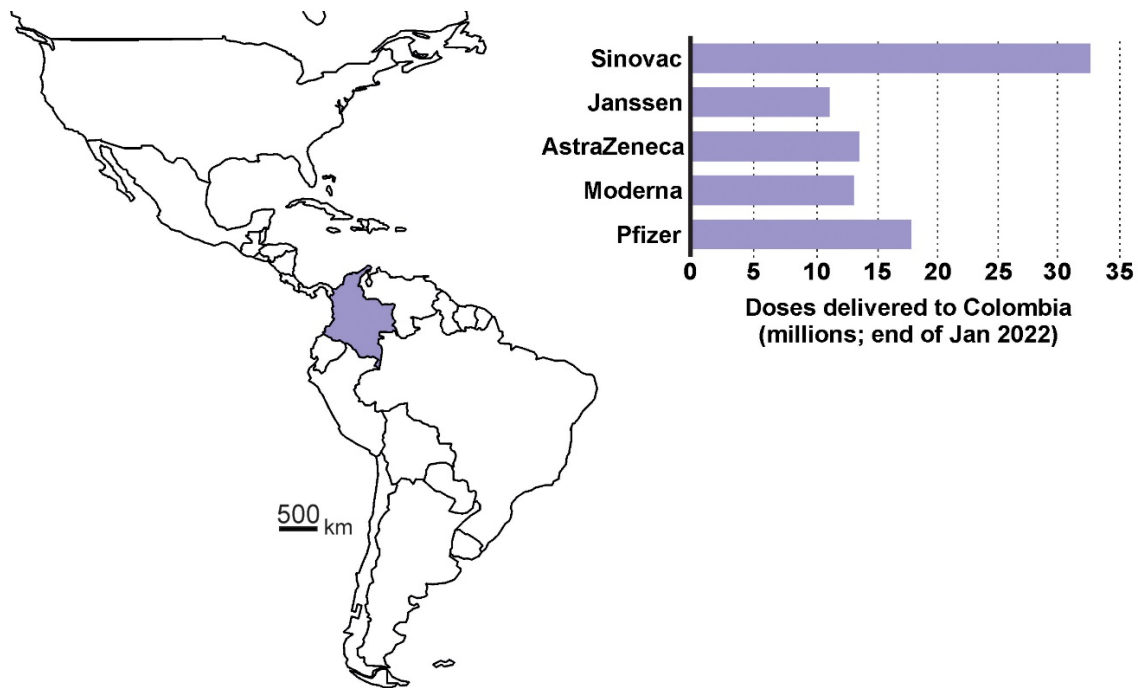

**Appendix Figure 1.** Vaccines doses delivered to Colombia as of January 2022 (<https://www.minsalud.gov.co>).

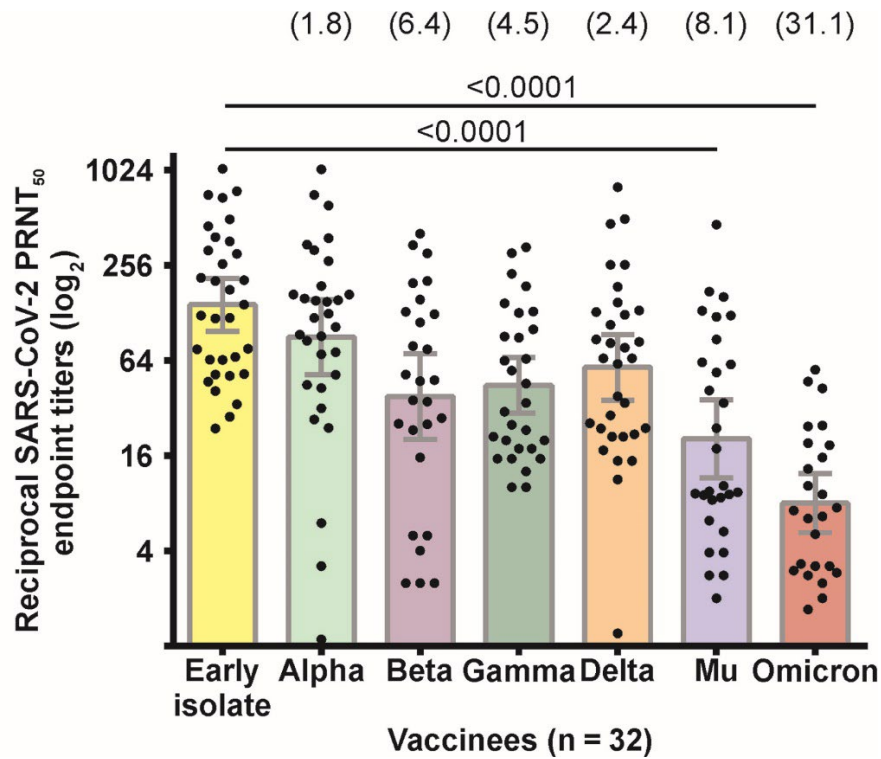

**Appendix Figure 2.** Comparative neutralization of SARS-CoV-2 variants by serum samples from persons fully immunized with the different vaccines (BioNTech-Pfizer BNT162b2, AstraZeneca AZD1222, and CoronaVac). Each point represents 50% plaque reduction neutralization test endpoint titers of 1 tested serum using different SARS-CoV-2 variants; the bars indicate the geometric mean titers, and the grey error bars represent 95% CI. Statistical significance was determined by the Wilcoxon matched signed-rank test and p-values are indicated on top. For clarity of presentation, only significant values between the early isolate and the Mu variant are shown.

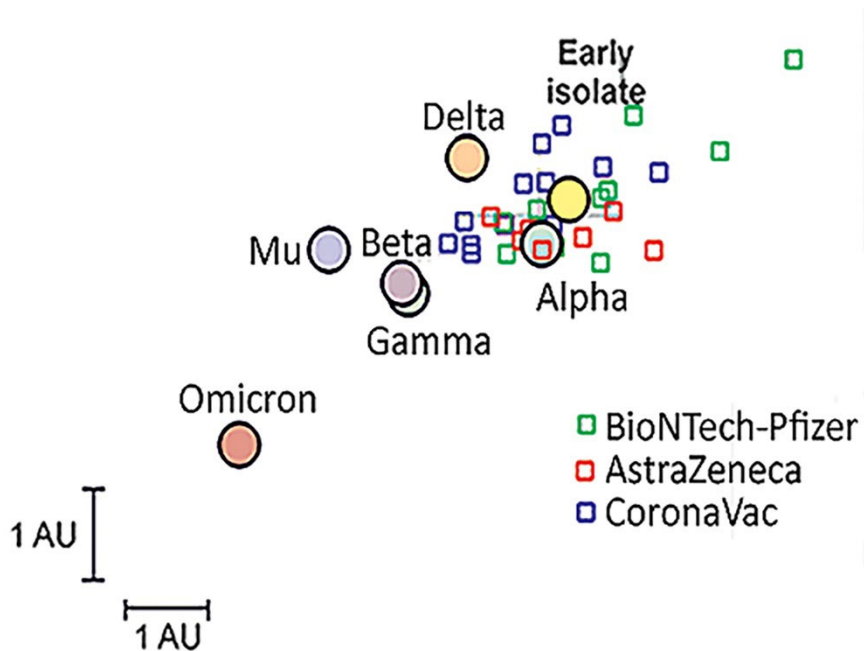

**Appendix Figure 3.** Antigenic cartography of SARS-CoV-2 variants based on serum samples used in Figure 2 A–C. Each square corresponds to a serum sample tested. The colored circles indicate the tested SARS-CoV-2 variants. One grid square (1 antigenic unit) corresponds to a 2-fold serum dilution in the PRNT<sub>50</sub> assay. To decrease uncertainty in the antigenic cartography, PRNT<sub>50</sub> all endpoint titers <10 were considered as exactly <10. Antigenic mapping was not done for naturally infected persons because we could not rule out infection with multiple SARS-CoV-2 variants leading to heterogeneous antibody responses preventing a meaningful antigenic map.
